# Supplementary material for: Optimization of a Multi-Residue Analytical Method during Determination of Pesticides in Meat Products by GC-MS/MS
Source: MDPI journal article supplement (doi:10.3390/foods11192930), 2022-09-20
Supplement: s1 [file s1]

**Table S1.** Physico-chemical properties and MRL of analytical pesticides in beef, pork, and chicken

| No. | Pesticide           | Substance group | Uses                          | log P <sub>ow</sub> | Vapour pressure<br>(mPa, 20°C) | Dissociation constant<br>(pKa, 25°C) | Water solubility<br>(mg/L, 20°C) | Molecular mass | MRL(mg/kg) |      |         |         |      |         |
|-----|---------------------|-----------------|-------------------------------|---------------------|--------------------------------|--------------------------------------|----------------------------------|----------------|------------|------|---------|---------|------|---------|
|     |                     |                 |                               |                     |                                |                                      |                                  |                | Codex      |      |         | MFDS    |      |         |
|     |                     |                 |                               |                     |                                |                                      |                                  |                | Beef       | Pork | Chicken | Beef    | Pork | Chicken |
| 1   | Alachlor            | Chloroacetamide | Herbicide                     | 3.09                | 2.9                            | 0.62                                 | 240                              | 269.77         | -          | -    | -       | -       | -    | -       |
| 2   | Atrazine            | Triazine        | Herbicide                     | 2.7                 | 0.04                           | 1.7                                  | 35                               | 215.68         | -          | -    | -       | -       | -    | -       |
| 3   | Captan <sup>1</sup> | Phthalimide     | Fungicide                     | 2.5                 | 4.2×10 <sup>-3</sup>           | No dissociation                      | 5.2                              | 300.61         | -          | -    | -       | -       | -    | -       |
| 4   | Chinomethionate     | Carbamate       | Fungicide, Insecticide        | 3.78                | 0.03                           | -5.28                                | 1                                | 234.3          | -          | -    | -       | 0.05    | 0.05 | -       |
| 5   | Chlorothalonil      | Chloronitrile   | Fungicide                     | 2.94                | 0.08                           | No dissociation                      | 0.81                             | 265.91         | 0.02       | 0.02 | 0.01    | -       | -    | -       |
| 6   | Chlorpropham        | Carbamate       | PGR <sup>2)</sup> , Herbicide | 3.76                | 24                             | No dissociation                      | 110                              | 213.66         | 0.1        | -    | -       | -       | -    | -       |
| 7   | Cyanazine           | Triazine        | Herbicide                     | 2.1                 | 2.13×10 <sup>-4</sup>          | 12.9                                 | 171                              | 240.69         | -          | -    | -       | -       | -    | -       |
| 8   | Cyprodinil          | Aminopyrimidine | Fungicide                     | 4                   | 0.51                           | 4.44                                 | 13                               | 225.29         | 0.01       | 0.01 | 0.01    | -       | -    | -       |
| 9   | Dichlobenil         | Benzonitrile    | Herbicide                     | 2.7                 | 2.9                            | 0.62                                 | 240                              | 269.77         | 0.01       | 0.01 | 0.03    | -       | -    | -       |
| 10  | Difenoconazole      | Triazole        | Fungicide                     | 4.36                | 3.33×10 <sup>-5</sup>          | 1.07                                 | 15                               | 406.26         | 0.2        | 0.2  | 0.01    | -       | -    | -       |
| 11  | Dimethipin          | Sulfone         | PGR                           | -0.17               | 0.05                           | 10.9                                 | 1843                             | 210.27         | 0.01       | 0.01 | 0.01    | 0.01    | 0.01 | 0.01    |
| 12  | Diphenylamine       | Amine           | Fungicide                     | 3.82                | 0.85                           | 1.03                                 | 25.8                             | 169.23         | 0.01       | -    | -       | 0.01(f) | -    | -       |
| 13  | Epoxiconazole       | Triazole        | Fungicide                     | 3.3                 | 0.01                           | No dissociation                      | 7.1                              | 329.76         | -          | -    | -       | -       | -    | -       |
| 14  | Esfenvalerate       | Pyrethroid      | Insecticide                   | 6.24                | 1.17×10 <sup>-9</sup>          | No dissociation                      | 0.001                            | 419.91         | -          | -    | 0.01    | -       | -    | -       |
| 15  | Fenamidone          | Imidazole       | Fungicide                     | 2.8                 | 3.4×10 <sup>-4</sup>           | No dissociation                      | 7.8                              | 311.4          | 0.01       | 0.01 | 0.01    | -       | -    | -       |
| 16  | Fenoxanil           | Amide           | Fungicide                     | 3.53                | 2.1×10 <sup>-4</sup>           | 11.44                                | 30700                            | 329.22         | -          | -    | -       | -       | -    | -       |

|    |               |                     |           |      |                       |                 |       |        |      |      |      |      |      |      |
|----|---------------|---------------------|-----------|------|-----------------------|-----------------|-------|--------|------|------|------|------|------|------|
| 17 | Flumioxazin   | N-phenylphtalamides | Herbicide | 2.55 | 0.32                  | No dissociation | 0.786 | 354.33 | 0.02 | 0.02 | 0.02 | -    | -    | -    |
| 18 | Fluopyram     | Benzamide           | Fungicide | 3.3  | $1.2 \times 10^{-3}$  | No dissociation | 16    | 396.76 | 1.5  | 1.5  | 1.5  | -    | -    | -    |
| 19 | Flusilazole   | Triazole            | Fungicide | 3.87 | 0.04                  | 2.5             | 4.19  | 315.39 | 1    | 1    | 0.2  | 0.01 | -    | 0.01 |
| 20 | Flutriafol    | Triazole            | Fungicide | 2.3  | $4.0 \times 10^{-4}$  | 2.3             | 95    | 301.29 | 0.02 | 0.02 | 0.01 | -    | -    | -    |
| 21 | Pendimethalin | Dinitroaniline      | Herbicide | 5.4  | 3.34                  | 2.8             | 0.33  | 281.31 | 0.2  | 0.2  | 0.01 | -    | -    | -    |
| 22 | Penthiopyrad  | Carboxamide         | Fungicide | 4.62 | $6.43 \times 10^{-3}$ | 10              | 1.375 | 359.4  | 0.04 | 0.04 | 0.03 | -    | -    | -    |
| 23 | Phthalide     | Unclassified        | Fungicide | 3.01 | $3.0 \times 10^{-3}$  | -               | 2.5   | 271.91 | -    | -    | -    | -    | -    | -    |
| 24 | Picoxystrobin | Strobilurin         | Fungicide | 3.6  | $5.5 \times 10^{-3}$  | No dissociation | 3.1   | 367.32 | 0.02 | 0.02 | 0.01 | -    | -    | -    |
| 25 | Propiconazole | Triazole            | Fungicide | 3.72 | 0.06                  | 1.09            | 150   | 342.22 | 0.01 | 0.01 | 0.01 | 0.05 | 0.05 | 0.05 |
| 26 | Quintozene    | Chlorophenyl        | Fungicide | 4.46 | 12.7                  | -               | 0.44  | 295.3  | -    | -    | 0.1  | -    | -    | 0.1  |
| 27 | Simazine      | Triazine            | Herbicide | 2.3  | $8.1 \times 10^{-4}$  | 1.62            | 5     | 201.66 | -    | -    | -    | -    | -    | -    |
| 28 | Thifluzamide  | Carboxamide         | Fungicide | 4.16 | $1.01 \times 10^{-6}$ | 11              | 7.6   | 528.06 | -    | -    | -    | -    | -    | -    |
| 29 | Vinclozolin   | Oxazole             | Fungicide | 3.02 | 0.02                  | -3.43           | 3.4   | 286.11 | -    | -    | -    | 0.05 | -    | 0.05 |

.

**Table S2.** Commodity groups and representative commodities

| Commodity Group                | Typical commodity categories within the group | Typical representative commodities within the category | Part of the representative commodities | Fat contents(%) |
|--------------------------------|-----------------------------------------------|--------------------------------------------------------|----------------------------------------|-----------------|
| Meat                           | Red muscle                                    | Beef                                                   | Sirloin                                | 22              |
|                                |                                               | Pork                                                   | Pork belly                             | 28              |
|                                | White muscle                                  | Chicken                                                | Drumstick                              | 11              |
| Fat from food of animal origin | Fat from meat                                 | Beef                                                   | Tallow                                 | 100             |
|                                |                                               | Pork                                                   | Lard                                   | 100             |
